# Supplementary material for: RSL Class I Genes Controlled the Development of Epidermal Structures in the Common Ancestor of Land Plants
Source: PubMed Central journal article supplement — Curr Biol. 2016 Jan 11;26(1):93–9. doi: 10.1016/j.cub.2015.11.042 (PMC4712171; doi:10.1016/j.cub.2015.11.042), 2016-01-11
Supplement: mmc2.pdf [file mmc2.pdf]

**Data S1, related to figure2**

**MpRSL1 locus. 5' and 3' UTR of MpRSL1 are highlighted in dark blue. MpRSL1 exons are highlighted in light blue. T-DNA insertion site are highlighted in red.**

```
>MpRSL1 genomic sequence (Scaffold genome v1)
ATCAATGCACATAAGGATCGGGCTTGAATCAAATGAGTTTATGATGATGCTAGATGTAAGATGCTAGTAACAATTATATAATAAATT
GTTACTAGCATCTGACATGATTAACCTTTTAGGTATAGTATTTGCGAGTGCTCTTTGAAGATTAATGAAATCACAATGTCTATATT
AAATTACAAAACATAAGGAAAAAAACATAATAGATTTTGTGACTTGTATAGAAGGCTTTTGCATACTACTTTGCAGAAGTATGAA
ACTTTTGCATATGTTAAATTAAGTAAAGTAAAGCACTTGGCAATGTTGCAATACAAAGTAAAGTAAATCCAGATTTCTTACCATTCT
TATATAATATTGATGTGTTTCTGCCACATTTTCAGCTCATCCATGAAGATGATTGATCATGTCTTTTGAACCTGTGTAATGTGTAAT
TTCAATATCCACTACATGTGTCATTGTTGCTTGTACTCTCAAATCAAATATACATTCTTCTCGCGTTTGCAGTCATAATGACAT
AGAGCGACTATTTTGAAGTTGATGAGTATCGATTAAAGCAGATAGAAAAATCGATAGGTAAGTTCGTTCTTGTGCCACATCAGTTG
TTTACGAAAGAATATCATATTCATACATCAACTGTCATACTAGCACATGAGAAGTTCAATTTTTATTATTTAGATAAATTCAGCG
GACTAATGCTTCCCATATTCACTATTTGTATCTTGTGCACACCCTGTTATTGTATGACTCTTGTCTACCCATGGGCTTTGTAGCTT
CTTTTAAAGTTTTGGTTTATTCTCGGACAGGACCCGAAGCGATTCATGATGAGGGCGTGTACGCTCAGATTCCAGGCAGGTATCCAA
TATTTTCACATGTTAAAAACTTGCACACTGTGGAATGTTGCAATACAAAGTAAAGTAAATCCAGATTTCTTACCATTCTTACCATTCT
TACTGTGTCTCTTCCGCGTTTATAGTTCAACTTGTGCTTTCATAGGAGTGGATTCCATTACTAAAAAACATAACAGTTGTGTAA
TTTGAATACTTGCAAAAGCATATTCATAAGACTGTATTTCTGGTTGTAAACTAACGTTTAACTAAAACCTTACCCTGACGGT
CTCAATGGTAATTAATAATCCGAGTTTGTCTACAGGAAGAAACGGAATGTTTTTTCCTCTCACATTGTACACTATACCAACTGT
ACTGAAGTATCTTGGAGCCTCATGTGCTAGATGTCGTGCATGCGTCATTTTTCAGAATTCAGTTTAAACGGATACAGTATTCAAA
GTAACACGTCATAGCTATAATACCGATTTAGATGTGGTAACGAACTTTATCCAGTTTGTTTTGGAGCAAACCTCTTTGGGTCAGR
AACACCGAATTCAAAACATGGGGGTGTAGAAGTAGTACTACCTGGTCAAACCTGACCTTCGAGTGTGTGAGTATCCAG
ATGTCGTTTGTGACCCGATGCTGACCTGACTACTCAAAGAAGTCTTCAAGATTTACGATCTGACGGTCCAGGTAGAAATCTACTCC
CAAAGTTCAACCTGAAATCAGGAAAGGTGCTCAAATATGAGTCAAAGTACTCCCTTACAAAAGTCCACGCTCATATTAGGAACGG
TAAATGTTACAAATATAGAAAACCTCCCTCACGTCGAGGGAACGTTCAATGTTACAGGCGTATTCGGGGCAAGATTGTTTGA
TCAGACAACGAGATTGGAGAAATACAAGGGGATGCTTGTATATCGAAAGCTAGATTGTAGCGCTCTGTAATTGAAACAGGAGACTA
GCTCGTATATTTCCCTCACACACTCCAGCATGCAAGATGTCTCGTGTGCTGCTAATTGACACCAAGAATACAATAAAGACTCGCC
CTATAGAAAAGTGGACAACCTCCGATACGGCAATTACCATTGTTCTAGGTTCTTTGACCTGACCAAGGATCATCTTGGAAAGTTGT
GATGAGTTGTGACCCGATGCTTCCGCGAGATCGACATTATCAGTTTCGAAAGTCTTAGAGGCGAGGTGAAAGCTGACATTTCTCA
TCTGCAGCTTGTCTGGACTACAGAATTCAAACTCAATCGCTGATCTAGAACATTTCTTCTACTCGTCTTTTTCTTACGCAAAAT
TTGCTGCAATCTTTACCGCAGGCAATCATTATCCTAGCCTCAAGTGCCTGCAAGTTCAGAGTATCAAAGTTGCTAATTCCTCAGC
AAGTTGCACAGGGGAATCCTATGACTCCTGAGTGTGTACCGACATACTATTTGCAGGATCTAACAAAAAAGGTTCCAGCC
TGGAAAAATATATGAAACTCTACCCCGGTTCCCTCCATAGTCGGGACAACCTTTCTTTTTTTCAGCTGGTAGCGGAAGTTGCAAACCT
CAGATTTGATGCAGACAAGGGTTCTCAAGCGACTGACAGATACAAAAAAGGTTGTGGCAAGTAACGCTAGTGACAAAAGCATATCAA
TATAAAGCTCGACTTGTCTGCTTAGCGTAGAACATCGTGGGGAACTCAACTAGTCTGCAAGAGTATGATGTAATCATATTGTC
AATGTGACATCAACCTTACGTCAAATTCCTCTGGATCTCAACCTATGTTCTTGATGTTGTTGCTGGTAAAGTAGTCGGTGAATGA
AGGGGTTGGTAGCTCAGGAATCTTAGTTGGACTTAAACCTGGGCCCTTCATCGATTTTCGTTTTTTCAGGGTGGAAAAGCTGTTGTACT
AACCGTGTACTACCCGTAACCTGCGTCTAGTCCATACTAAGGAACTACCCTCCACAGTATAGTACGCACTGTACAGTAAGTAAAG
CAGTGGAGGGGATAATGTGCGCTAAATATATGTGAATGTAGGACGAACAGAACGTCGGGAGAAAGTTAATCCTCCAAATCTGGTG
ACGATAGATGCGGGGACCCTGATACACAATTTCCGCTGAGCGGGACCCAGGCAGTAAAGTTGCATGGGGAACCTCTTCTGTATACC
CATCCCATGCCCAATGCATGCATGCATCAATCCACATCATGCTGGCCACCCCATGCAAGGCGCATATGGTCTAGTCTGTGCTG
AGAATCTGGCCTGGCTGCCCGACCAATTAGAAGGGGCCACGTCGCCACCTCCTCCAATGGCTAGATAGAGCGGTATTCTCCAGG
AAGTCGAACGAATTCCTTACTGAGATGTTTTACTTTGCTTCCCAAAGTAGAGGAGCATACTGTGTCTGTTCGACAGGAGGAGC
ACAGAAAAGCTTCCCGAAGGTAGTTTTCCGTATCGTTACTACTATCTGTAATCAAAGCTTATCCTTCCACTTTCTACTTACTACC
AATCCGAGCTTTGACACGTTGCTATCACTGAACGCATGATGGATGTCCATTATGGCTGTTTAACTGTGGGTAGGCTTCGTTTAAAG
TAGACACCTAGAATGTGTGGACGGACGGATGGAAGAAAGCTTTCGAACCGAGAGCCTGCTCTAATCGAATTTCTAATCTTCACC
AACTAGAATATACTATATCACTGATTGAGGTTCTTCTTACGGAAAGAAAATTAGTACACTGTATGTTAGCTCACCAGTAAGTATC
TTACGCGTACTTTTCAATTTACTAATTAACACTAAGCATCCGCTAATAAGTTCTCATGGTGCAAAACCGCGTCTCTCGCGTG
CTACGGTTGCGGGCATATAGTGCACGCTCCAACGAGGCACTTACTCCGTTAGAGTTGCAGAGGCGGTGGATCTTGTGGAATGGC
GAAAGTAAGGCAAGTTTTAGCTGGACGTGGGATGCTCTCTCCATGTTGCCAGACTGTGCGTCTCGACGCGTAGCCAACAGTAGCGA
CAGTCATGGTCAATCAAAGCTTGCAGTTTCTGTACTATTTTCGTTCAATTAACATGTGAGAGCTCAATGCTTGACATGGATCAT
ATTTAATTGAGGGGAATCGGCGGGCATCGAGAAGGTACCCAAAAGACTTCTCGTGTATAGCAGTACCCCGGTGCTTGGCGCTC
GTTACATTTCTCCCGACACAATATCCAATTTGGCGTTGGTGTCCCGTTACAAGGATATGATTTCTTCTGCTCTTCTTCTTGA
AGTGAATTTAAATCTGACTATGCCTATTGTGGAAGAGTCTGTTGCTTCCACTTAATATGTCGTAATCACCGAAAACCAAAAACA
TAAGACGCTCATCTCAACAGTATTCAGAAATGGTTAAGACAACTCCAAATGACTCTCTCCGCAATATCAAAGTGTGATCAAAAT
CTGAGGGATCAAGCAATTTCCAAGCCACGCGAATAGAGGAACCAAGTAACTTTCCAGAACTTGAATTAATCTCCATCGAGTACTA
CATGGATCAAGAGGTAGCGTGTGCTCTCTCAATACCATCACAATCGAAAATATATGACTTTTGTACCTCAAACATTTTAACTGT
GTACATCAGAGGATCGGCTTCTTACATGGTCACTACATGATCATCAGCTTATGTAATAGCATTGCTCTCTGAACTTCCACAT
CAAGTAATGTAGATGTTGAAATTCCTGCGCTCACAATCACGTTGCTGATCAGGAAAGCAGTTGGTTCCGAACCCGAATCCTATG
TTTTAAATCCCTTGTACACACGTTCCAACCTTTATCAGATAGGATTTGCAAYTTTTTTTATTTAATTTCTTGTCAACGTCAAGGTA
```

TTTGTGCGGATCCTGGGAAGGGAAATGAGTAAATCAAATTTGAAGGGAAACAATTTACTAACTTAGAGCAACTTGGATATTTTGGAT  
TACTGAACAGGAGAAGAATGTTCCAACAAAATGGTGACATGATTTTCCAGCAGCTTATTTCTCATCAAGGCAACCATCM  
TTTTGCTTGATGTTGATGATAATGACTTTGATTACTTACAACGGGCTGTGGTATTTTCTCTTTGTCCGTTTGAAGCCTAAGTTT  
ATCATATACTTAGATGGGCGGTACATTCGATTGAACGTTTTTAGTGATTGTGCTTTGCATCCGCATCTTTTATTAGTCTAAAGGGA  
CTGTAGTGAATGTAGAATATATTGACATGGTTGAGGTTCCACGCATAATTTGCAATTAATAATTCTTTGATGTTATGATAAGTTA  
ATGTTTGTCTCATATAAATTTGGGATTCAAGTCGGATGTATAACTATAAATTTGAGAATAACAAAGAGCCTCAACCATGGAGTGTA  
CAGAAATATGTGCATATTCGTAATAAATTAACGTACTTTGATTTGAAATTAATAACTCTAATTTTTTTTTTTCAGAAACGTTGATTCTTA  
CATATGATATCTGAAATCTGCTTTGAATTATTCGTAATCAGGGCATTCAAATTTCTACAAGATAATCAAGGGTGGTATAACAAAAA  
TTTTGCCAAATCGCAAAGAGAAATTTGCAACCGGATGGGTTAGCTACCTCGCTTGTCTTTGCTGTCCGGACTTTGCACTTTATGTT  
ATGTGTAATGAGGTCCTCATTTCATCATCCATTTGTATCTTCTCCTTTTTTTTTTGTGCAATAAACACAAGTTAGCCCTCGTTT  
CGTGAGTTGCGTCATGTAAGGGTCTTATGCTCCTTTTTTAACATATTTGCTGTAAACCATGGGAAAAGACCCCGGTTCTTTCTG  
CTCCCTTTTTTCTTATTACCCAAAGGAGCTGACTTGAAAACGAAATACATACATAGAGAATAAACGATGATGACTCATGCACAGCC  
TAATAGGGCATGGTTCAAGCATAATCATAGCTTAGCTAATTTGTAGTTAGAACGTAATTTGTACTAACACGGAAAGAAAGATGT  
CGCAGCAGGACTATCGTAATATGAGTGTGGGTTCCACACGGATGTTCCGGTCCGCACAGTTTTGTGCAGATTATGACTCTGGTC  
ACTTTCAACTTGAGTCAGGTCACAAGCAACTGGTGAAGAGGCCCTATAAGAAGTACGTACTTCTTATGAGGCCCTTCCACGCCTC  
AATCTTAGGGAAAACCTCTCCAGACAGTAACTATGTGGCCACTCGGACTTTACTTCACTTCATCCCATCGGATATAGCATCAACAAA  
TTCGGATAGCAAAAACATCGAATGAAAGAGGAAAAACAACATCTTTGCATTTCCGTTGACCTAGATAGCTTAGATATTTTGTGTGAC  
GTGTGACATATTTCTTCTTGATGATGACTTTATCTCTGTTTCTGTTTCTGTTTCTGTTTCTGTTTCTGTTTCTGTTTCTGTTTCTGTTT  
TCCTCGGTTTTCTGTTTTGGCTCTACAGATCCAAAAGTCTTTGAAATTTGCATTGGCGTTTTAGGATTTGTTAATTAACGCCAGCAA  
CTCTGTTTTGGACCTATCACCACTGGTATGCAATGTCGACAGTGCACCCGGTGCAAAAGTTCCGTCGATAATGTTGCTGAGTGATG  
AAGACAAACATAATGATAACATGAGCTCATTGAAAAGCATCTAACGACAATTACGTGGTTGATTGTTTTGCAAAAATATGAT  
AGTTCGCTTGTTTTTAGTTTTGAAAGACTTTTTGTGAGTCAAGAGATTCGCTTCTTTGGGCAACATCTTAAAGAGATGGCACAGAGAG  
GGGAGCTTTGTGGCAATCCTGAATTTGGGAACGTATTCTGTGATGATATAGCGCGGAGATACTGGGAAACGGGAAAAAGCTGAA  
GTGCCATGTAATTTTGTGAATCGGATTAATTTGCTTGTCTTGTCTGTTGTTCAAGAACAAGAACTGGAGGAATCTCGTCCCTCTCTGGGA  
TTCCCTGTCAAGTTTCAATTTCCACTTAATCTGACAGCTTCAAAACATCTTGGTGGTAACTCGTTTGGAAACAGGAGATAGAGTAG  
GCTGGGTAGGGTCCGCTTTTGGAGCGCCGATTTGCCATTAGTGAAGGTATCCTTACGTCACTCTCCATGTCGCTTCTCTCAAGA  
ATGACAGGTGCCCGCTCACTGTCACCGGTATCCCAACCAAAACCGGTTTTACTTCCGCGGTGACGTGGGCAGATTTGACCATATA  
GATATGTTTTGGCAATTTATGATTGGTGAGCTACGTTTTCCGTACACATCGGACGATGGGAGAAGGACGGGGCACTATTACGTTGC  
CGGTTGACGGTAAGTTGAACTTCCAGAGCAGTACTTTCTACCTCTGGTTTTGTTTACTAGTAATATGTCGGTAAATGAATCTCGA  
GATTACCGTACCACACTAAAAGCGGTTTAAGGAATGGCCAGACATAGTTAATGAACGTCTGCATAAACCTCGAATGTAGCAAAA  
GACAGACCACGCCAGCAAAAAGGTGACGAATGATGCAAGTCCGCTACAGTACATTTTACACATATCCATTGACCGAATTTGATG  
TCAAAGTGATCGAGATGCGAAAACAAGACCGCCGTTGAAATCAGCCGGTATCCGGTCAAGGCTTTACGGTTCCGAAAGGAAAGGT  
CAAGACCTTCGCGAGAGAGTGATAAATTAATTTAGTCAATTATATAAAAACAACAGAACCTGCTAAGGTACCGTCACTCTGCTGCTGT  
ACCCCATCCACTTTTCGATGTTCCGTTTCCAGGTCATTTCTGTCCCTTTAAGCAGCATCCAGACTTTGTCCATTTGATGGAGATT  
TGCTAGCTTGGAAATCGAAAGTCAATGCTGGTTATAATATTGATAGCAGCTCAGGGAGCTTACACCTAATGTTGGAACCTAAAAGR  
GGCCCATGATTTGAACGGAGTGCCGAAAAACATTTGAAGATGCGACATGCGACACTGTTTTCATCAACAACATTTCAAAGTTTACGA  
AAATGTGATTTGCTGCTCGCATCTCACCGATTCCAGGCTATCTATCAGTAGCAGCAACACACACCGGTGTGAAGGATATGTTTC  
CACAGAGCACAAGTTAGGCATTTGTCATGCTATTGACTCTCTGTTTCTGTTTCTGTTTCTGTTTCTGTTTCTGTTTCTGTTTCTGTTT  
TAAACACAATATGGACGAAGTGTCTCCATCCACTCCCTACATCTCAGTCGTATGCCTTCAATGCCTGGTGGTTTTGGTTGCTTTC  
ACGCGGAGGTTGATGGCGAGATGTTGCAAGTCTTCCGTTCAACGAATTAACAGGGTCATAGGACATAGCAACCGAGGTATAAGCA  
ATGTTGCAATCAATGCCCTCTTTCGTCATCCTCCTCCTCAAAGTTGAAAGAACAAGGATTTTAGCATAAGCGTAGGTGTTTTAT  
CAATACTTCACTGGAGTTGGAATGTCTCGAATGAACGTACCCATGGATCCACAGCCTCGTAGGACGAATAATCCAAACTCGGTCC  
TCAAACCAATGTAAGTCTCTCAGACCTTAACACGCTCGTGAACCTTTTCCAGGCATCTAGAGTATTTCTGAAGAAGTTAAACTAGAA  
GGTCTTGTCCAGTCACTAAATCCCTGTACCTTTAGTAAATTTGTTTCTGTTTCTGTTTCTGTTTCTGTTTCTGTTTCTGTTTCTGTTT  
AAAGTATGGAAAAACATGTTGTGCAAGCGGTTCTGAGAAATAAATTTGTTCAAAGAACAACCGGAGTCTGCAGCAGCTCTATTCAAT  
TCCGTGCTAGCGGTTCTTTTCCACACAATTCATCTTCTGACGCAAACTTAAAACCTTAATCTCGGACTCAGATATCCTTGGTGTGCG  
ATTTCTTTGATGTATCTGTYGAGAAGAATGTACGGAGCAAATAGAATGCAGACTCTTGATCACCTTTTCTATGTTATAGAGCGTCT  
ATCCTTGATCTTTAAGATAAGAAATATATATTTCCGATAAACTGAGAGTAGCTACATTTTATGAAAGAAAGATCAAAGAATGTAA  
ATAGGTTTATAAAAATGATTACGTTCTACAAAATATCATGCATATATGTTTAAATATTTATACCGATTGGATTCGAGGGCAGAACT  
ACAGTTTACCTTATCATGATATGTTAATGATCATATCATGGACGAGTATCTGCTTTTTCAAACCTTTGGTCATTACTGCTATGAAA  
CTTGCCATTAGTAAAAACGTTGCCCAATTTATATCGTCTGTTTACACACTTCTGAGGCACAGTGAAGTCACTTGGCGACAACCATATA  
TATCTTGGAGTAAATCATGCATGTTATTAGTTCTATCATCAAAAATAAATTTAACTTGTGTAGCTGGAGGACAATGTAACACCAAT  
TAACATTTGTGGAAGAACAATGTGATCTGCTGCTGAGAATGGCTAACATACAGTCCAGGTTTGGAAACTTGAAGAAAGAAGAACA  
ATGCCGAATTCGTTATCGACCATGATTTGTGGCTATAGAGTTGGATGCACAAATATCCAATTTTTGAACCAGAAACAGGGCAATA  
TCCGTCTACGTTCCAGTCACTGTTTCCGACACGCTCCGGATCGTCTTTGTATCCCTTGATGATCAATCAAACGAAATCTTGAAAT  
GTTCTGTTGGGTAAGCTATCCTGGACAAAGAGTACGCACACATATACTAATTAGATCTTACAGTTGAAACTGGAGCAGCTTGAAGTA  
TGTTAATTAACAGATATTTGACAGAATAATCGACTTCAAAAGACTGTGTTTCTTACTTTTCTGAAAACAGTTGATATTAGTCAAT  
TGAATCTCGTTATAAATAATACCCGCTCTCGTGCAAACTACAAAATCTGCTCGAAATAAACATTTACCACATTTATATGTTAGAG  
AATTTATTTAATAAACAAGTAGGAGATGGAGCCTTAAACAATTTGAAATGAGAGTTGTTGCAAGAGGATGCGGAGGATATGCACA  
TTCAGCATTATGCTTTCAAGTTCGCATATGTGAAAAGGCCCATCATCATCCTGGTTGCAACCAACCTTCTTTTCTTTTACTTTTCA  
AGACTTCACATGATTCATTCTACGGTCTTTGTTGTTACTTTCATATATATTTCCCATTCATTAACCTTGTTCATGGTCAATTACTA  
AGTTTTCTATCCACGTTTTTTCGTTGTGCGGATTAATTAATCTCTTTTACGGATAGTACATATTTCCGCGGGTACTCTTACTAGAT  
TAAATATACTTTTGGCCACTCCAGTATTGTAGTTTTGAGAGTCAAGGTGTAAGAATATGGTCTACCTTTTGTACTTTTTCATGATCT

CCAACTTCAAAGGGATATATGACATCTATACATGAAAATTATGTATCTTAGAAAACTACTAGGCAATATCTATTTCGGAGGAATTA  
TTTAACTAGATGAATTTGTTTTGTATGATATCCACATGTGTTTTGAAATAACGCTACTCAAGTATCCCTCATCATATTTAGTGGC  
ATTTAGGTCTCATTTGCATAACTTTTCATCATTCATATTAGTGACATTTTTTCTCATGCTTGCTAGACTCTTACAAATGTAATAAT  
TATTTGTTGATATCATCAGACCAGGAATGTTAAGTTTTGTGATAGGATAATTTCACTTAGATAAACTACTATAGCCCCYTTTATAT  
GTAGGATACGTTTTGAAACCATACATCATGTTGGATGGTTCGTCATTTTGGAAAGTGTGTTTCTATCCTTTGTATCACTTGTAC  
TCACTCTTGCTATARTAAAACGTCATGTTTGTGAATCTTTGGCTTGGGATTGCATTGGAGTTTTTTGGCTTACAGAACTACCAACT  
TTTTTAATAGGAAGCTAATATCGCCTCTAGTTAGTTAGTCAAGCTATCATTTCTCCAAGTGATAGAGTTCACAAATAGCTAACAT  
GTTAGGCAATAGGGGTTTACACTCGCTTCAGCAAAATGATGTAGTCTATTTTCAGTCAATAATATTAGGTGGAGCTCCATATTATTGT  
AATCTGTGAAAAAGTATAGGGGGCTTACCATCCCTTTGAAACATTAAGTGGTGTATGAACTCTCCGTTCTTCCAAGTACGACT  
TGATAATGGGGCCATGGGACCTTCCATCCAAAATAACTAGAATGTAACATTTGCTGACCTCTAGCATATTTGGTGTAAACATGT  
TCCCAAATCTCCTATGTGTGGTTTTTCATTACCATTACAAGAATATGTAGAGTGTCTGCGTTGAAGACAGATATGTTCTTGTATAT  
ATGTTGTATTATGTCAATTTGCAACAACTCTCAAGTCTCAGTACTGACTTTTCGCGGAGTTATGTTCCCTTGTCTGTACCGTAC  
GCAAGATATTGTACCTCAATCCCAAATGCAATTTCTATTGTGTATTCTCTTCTCGTGATCGAGCCACGAAGTGAAGTCCGTTAG  
AATGATTAGAAGTTTACCGTACTCTCGGTGATTTCTATTACTAGTGTAAAGTATGATACATACACGATTCGTTAAACCGTAA  
CTGCAGATTACGACATCCGCAGTAAATCATGCTGGTGTGTTCTTTGAGGCGAATGAACCATCAAGTCTGAGCTGCAATATGTGGG  
GTGGAGCTCCAGAACGAATTGAAATGGTCTCGCGGAGGCACACTGAAGTAGCCTCCAGCAGATGAATTTGTTTTCGTTGGGATCC  
CTCACACCTAGAACACAGTTGATCAGGATTTACACTCATCAGTCTGAGGGAATAGTCCGAGGTGACGTCAAATTTGTCTGTTTC  
TTTTGTATCTCCTATGTGTGGTTTTTCATTACCATTACAAGAATATGTAGAGTGTCTGCGTTGAAGACAGATATGTTCTTGTATAT  
AGACCATGGTAGATTGGTTCTCTAACATACTATCTGTTGATCACTTTAAAACCCACAGAACAGAAGCAGAGCGCTGCCTTTTTCAGT  
AGAGGACGGAACCCGAGTCTGTATCCAGAACGTAACACTGTACAATACTGACGTGAGTCTTGCGAACGCTACAGTTCTCAC  
TTTGGAACTACTGGGAGATCTGTAGGCCGACTCTACAGGTTGGTTGCCATTGAATCAGGCCAGACAAGTGAAGTCAAATTTACT  
TGCTAGGCTTTTCGGAAGTGGCTCCGTCGGCCCCACTCCGGTGTGTATACCCGCGCTGGCTCATGACAACGAATGGTTGGT  
GGGATGGACGGACAGGCCGCTGTCTCAACTCACTCAGCCTCTCGATCGAGTTACACCGTAAGTCAATTAAGGAGAGAATCAAATGAT  
GCTATGCCGAAAAGGCCACTTTTCGCGGACGGACGGGTTGGGGAGATGGGTAATAAAGCTGGCTGGGTGCTGACTAGGC  
TGTGACGTGAGAAGCGTGAGTAGGCTCGTCGATAAACCCCTCACAT**GAACATTTCGAGCAATCTGTGAA**CAGGTCACCTGTGCGAAGAG  
CACCAGGTTGAACGAGCAAATGAATTGAAAGCAAAGAAGATGGAAGTGAACCACTATACCAGAGGCAACGGCGGTGCCATTTCTCT  
TGGCTCTCCCCGTCAGCCAAATCGGGGAGGAGTTCGTGGAACAGTGTGGGACAGCCATGACCCTCTCATCATGCGCGTCTGC  
CCGTTCTGTCTTGCATAAATGCCGAATCGCTTGTCTTCTCTGTGCTCGACGGAGTGAAGGTCAATCCGTCGGTCCGAATTAGTC  
ACTTTTGAATAAGACGAATCCTGAAAGCGTGTCTTATGATGAGCTACAGTCCAGCCAAATGCCTCGACCTATCCCATTGTGCA  
TTCAAACGCACGCGTGCACGGATGCCTCTAGAGTACGCGTCAACGCTCTAGATACACATGCTAAATTAGAGGTGCGGGAATCCAC  
ATCTCCCTCAAAGCGACAAGTTCGGCTTATGCCGCCCTACACTCCCTCCCTTGTGCACTACACTAGACCAGCTCCCTCGGCATGG  
CATGGAAATAGCCGAGAGCGTGCAGTCCATGTCTAGTACTTTGATGGGAAATTTTCTTCTCAGTCCAATGAATACCTATGT  
GTACTCTATTATCGAGCTTCTTTTACACAAATATACCAATAATAGGAACACCAWTGTTTCAAAACGGAGTGATATTTATCCTTACG  
GCAAACGTACACTCTCATTATTTTTCAGTGAATAATTTTCCATTATTTTCTATTATAAATAAAGTATGTCCATTTCTTCATGAA  
AACGCTTTTACATGAATAGCCCTGTATCTTAAGTTTTCAATCTTAATTGATCGTACTCCAAATACATGTAATCTCAAGCTTAATG  
GTAATAGATCAAGCCCTTGGGTAAAAACACAGTACAAAACAACTCCAGGAGAGAACCAAAAGAACCTCCTAATGTACCAA  
TACCTATTTTGTGTCACCTTAGATACAAGAATCCATGAGGTCTCATCAAATACCTTCTCGGTGTAAACAAAGCAAACTATTGGG  
GTTTCGCAATGCAATAAGAAAGCACTGCCATGTTACTTACAAAATCCATTATCCTAGAACAGCTGACGTTGCAACATAACAGGCAAG  
CAAGTGACATGTTAACTAATAAGAGGATTAAGTAAAATCCCTTCTTGGCTGGCGTGTTCCTACTTCACTTCACTTCAAGGAT  
TGTACTCCAGCGGTCAATATGTAGGTCAAATAAGTTCAACTGTTCCAAGAGTGATCATTTATTGATCTATGACCTACGTTTTTGGC  
TCAATTTAAGTTGAAAATATGCAATAGTGGGGTCTAAGTGTGAAATAATTTAATCAACGGGTATACATTTTTTTTTTAGTTTGGATT  
TGAAATATAGGAGATCTATATTGAATATTGTATCTAGATATTTTTTTTTATTTCTCACCAGAAATCTTTTGGAGCATAACTTACAA  
TTTGTATGTTGCTTTCAGAAAGAAAATTTATGTCTTACTTTCGATGTGACTTGATAACTTAGGAAGACATTTATATCTAAACATTGAT  
GTAGGAACCTCGCCTCAAATAATAAAGGACAACTCACTCGATCAGTCACTTCTAGAGGCATGCGGATCAACAATGGCAACTAA  
CATCTGGTATCCGATTTGCTCATATACCTAAACTATTTAAACGGAAGAACGTTTTAAGCCAAAGATGAAAATATCGATGTTTATGAT  
AGATAGACGGAAGGAGAGAATCTCATGAAATTCAGAGAGAAGATTGATAGCAGCATTTGTTGATGGCGTTGAAAACAAATGGCTTTA  
TTGATCATTGGGACCCAAAGTAAATCGAAAGAACATTTATTAGACTAGCAAGATGTGATAATCTGCTAGCCAGGACGACATCGGTT  
TATGCATTGGATAGATTGAMGACTTGACTACGGATGGTACAACGGATAGTGAACATTTGGTTTTATACAAGGAACATCGTCA  
ACTCGATGTTTTGAAGAAGGCGAAGAAAGCTGTAAGCTAATGAAATGTTTTTTTAGTCAAATTTCCAAGTTTTAAGGGTTGTGAGTTC  
CTCATGTTATAAGCAGAGAAGAAGTATCACATATAGATGTACAACCTTGAATAGAAAAATAAACCATGAAAATAATCATTCAAGTG  
CCCTGAAGATGATTTTTTTTACTTTTTAACCTGACATAATTTATTGAAGCTAACAGCATTCAACCCGTTTTAGTTTACTATGAAAT  
GTAGTTTTGAATACGTAGAGATTTTTGATCTCTTGAATAGAATTGAGACGATGAAAGTGATTGAGTAGTATTTGAAAGACATTTGAA  
ACCGATTGTAGAACCCGAGGCGAGGACAATCTTTCCAATTTATTTTTTAATTTATAGAAAAGTGGGCTATATAGAAGAGATCTACTTCA  
ACACCTTTGATTTTCGAAATATCGATCTCAGCTTCTTAGTTTGTCAAATGAAATGTGAAATATTTTTATGTTTTTAGACAATCTTTA  
CGAGCCAACAGCTATTTTACGCCATTCAAAATGAAAATAAATTTGAAAGTTAGTATGAAATCAGAAAACCATTAAGTGCATTGT  
ATAGTCCGTTAGGTTTTCTATTTTTTATGAAAATGGATGACTCGTCAATTTCTAAAGACAATGAGAAAAAGAATGAGGGTTTTTGGC  
TTCATAAAAAGTTTTTTGTAATCTATCTAACCTGTTTACCACCGTGTTTTCCAAGCCTTCTAATATCTTTAACTACTCCCGGATGGT  
CAAGCAGATCTGAGACTTTTCTGGATGCCGATAAGTTCGAGACCTAATACTTGTGCTCAATTGAGTTTCATCGCGTATGAGTTTGGC  
ATGAAATTTTTCTATGTCTGTCTCATGTCTAAATTTGAAATTTGAGGTGTTCTACGACAATTTTTTGGCTTGGCATATAATCCGTAT  
ATGGACCAAGAAAATGAGTATAGATTCACATTTGTCTCCCCAACAAAGTTGTTTGCATGAATACCAAGACATCACTTGTTTTTG  
ATTTACAAGTGTCTCTCGTCTCAGCTACACCCGATATATGTCTCTGACTGACCTTCGTAGCTATGGGCTGTTGAGGGTATACA  
ACGTTCAAGTTGATAGCTGGAGAAGTAAAGTAAACAACCGGTTGACTGAAAGGACAGAGGTTTGGGGCATGAAAATGTGGACCTAC  
TTTTCTGCCGATAGCTCACCTAGCTTTGTGTAGATTAGCACAGCTAGATGAGGGCAAAATGGCTACATTTCTCTCCAATGCAACGT



CAGCATCTTCCATCGTGAACCTTCTTTTCATCTGCGAGGTCGTTGCCGATACGGCATTGATAGATTGGGCTGTTTATCAATACCA  
AGGGAAGGCGGACGTTGGTTAAGACCTACTTATCCCAATCCTTAACATTGTTTCGCACTTGAAGTGGACGAGTTTTAAGAGATTTTT  
TGTTTCATGTAG**GTGCTGACTACTGACGACTATTGGCCTTCCAACGAGAAGGGCGCTGCCCATGTACTGCTCTTCCCAACTTTGAA**  
**GATATGGAGGGCGCTCTGAAAGTTCTGGTTCGCGCAGGCTGAGAAAAGAGGCAAATCCAATTTGAGTAACACCCTAGCAACAACGG**  
**TGGCAATTCAGCAGTAGCAGTCAAGAGAACAATCACCGAATCAAGCAGACAACAACCTCGTCTTGACAGTTGATGTGAGAAACAC**  
**CGAATAATAGAGGCTTCGAAAGTCAAGAATTCGCGATTGACGTCGAGGCTTTGGAGAAAACCTCTCCCACTGTTTGAAATCTGAAG**  
**GATCTCGAGAGGCCCTGCCGACTGTACGCCTACATGAACTTGTTAATGCGAGCCATCCTCATGGCTTGGTCTGCATGATGAGATG**  
**ATGGCCTTAAC TAGATGTAGTGTAGTGTACGTACATCTCGGAATCGAATTGCATGGAGGATTTACCAGTCGCTTTCAGCATAAGA**  
**TTGTCTGAAGTATACTGCTGTTTGAGATT CATA CAAGTTAGACTTCCACGAGGATTTGTCTAATGAGTGAAGTGAAATCAATATT**  
**AGCACAGCTGTACTAGTGTACTAGACTAAGGACAGGACTCGACGCTTTAGGACATTTGATTTATTCAGAACTTAAAGCTCTTGC**  
**TTTACTAGCATAAGGGCCTTTGTTCAATCCCTAATTAGCTTCTGATTAGCTCGTGATTAGCGGCTTGAACAGAGATAGGGAACCC**  
**TTAGTTAATTAATTAATTAATTAGGTGAACCGGTAATTAATTAATTAATTAATTTCTCACATGGTTGGTGTGATGACATGTACACGCA**  
**TCATGTCTGCAACGCCCTAAGGAGTAGTGGGGA**AGTGTGTCAATTTGTCTTGCACAAATGTTTGTACAGAAACAAGCTCCCAAAGG  
CATGTGTTTCCCTAGTCAATTAGACGATATTCCGCCCTTCGACCCACGAGTTAAAGTCAAAGTCATAACTAGAACAAGCGAAATAAGA  
AAAAGAAGAAAAGGTACGAAGTGCCCTTRGAAACATATCTTTTTCATGACTGCTGAGAACATTTTGTAAACAGTAATAGTAGCCTAAGT  
GAAAAATGATTTCGTGGCGACTAACAACATATTAACATACACTTACTTCCCTACGTATCCATCACTTGGATATATCAGTGAAGCCCA  
ACAACTAAAGAAAACGATACTGTGACCAGGTTAACATTGCTACTGACTGTAATATGAAAGATTAATATGCTCAATATGTGATTA  
TACATGGAAGCGTCGATTATTGTCTCAACTTACAAGTGTGTTCCCTCCAACCTCTGGAAACTTGGATGTCCGCCCAATGATAAAG  
ACAGAGATGCAATACATAAAATGTGTTAGTAGCATTTGGTTTGGAAAAAATTTGTGTTGGCTCTAGACGCGGATGGGATATGAGAGG  
TCAGTTTAGGATCGGACCAGATGTATATTTCACTAAAGAAAGAGATAAGCCAGAAAAATTTCTACAGCAAATAAACAGCACACTTT  
TAAAACTCATGTGAAGATTTTATACGTTGAATACATTGTACATCAGTTATCTTATGAGATTTTGAACCTTACTCAAATCTTCCC  
ATGTGATAAAGTTGTAATGAAAAATTCCTCAATGTAATCGGAAGACATTGAGGAATTTATTATTGGAGAGATACGAAGATTTACTT  
TGATGAGATCAATTCGGAACAATAGAAGTCATTAGTGGTGGTATTACTACTTTTATAATGTCTCAATTTTACTTTTGTATATCTG  
GAATGTCAAATATTTGGATGTCAATTTCCCTACATTTCAACACTATAGACCATATCTTGGTTTTACGTGTTCTATGGGAGAAATCCAA  
GGTAATGAAAAGCTTTGTTTTGTGCCTTCATTGATTTCAAGAAAGCTTTTGGACACAGTACCTCGTGAGCTTTTATGGC
