# Supplementary material for: RSL Class I Genes Controlled the Development of Epidermal Structures in the Common Ancestor of Land Plants
Source: PubMed Central journal article supplement — Curr Biol. 2016 Jan 11;26(1):93–9. doi: 10.1016/j.cub.2015.11.042 (PMC4712171; doi:10.1016/j.cub.2015.11.042), 2016-01-11
Supplement: mmc3.pdf [file mmc3.pdf]

TGACCCNNGANNACAAATTTTCGCGTGAGCGGGACCCAGGCAGTAAAGTTGCANGGGGAACCTCTTTCTGTATACCCATCCCATGGCAATGCATGC  
ATGCATGCATCAATCCCACATCATGCCTGGCCACCCCATGCAAGGCGCATCATGGTCTA**GTCTTTTCCCGTTCCACATCATAGGTGGTCCCTTT**  
**ATACCGCTGTCCGTCATTTTAAATATAGTTTTTCATTTTCTCCACCAGCTTATATACCTTAGCAGGAGACATTCCTTCCGTATCTTTACGC**  
**AGCGGTATTTTTCGATCAGTTTTTTCAATTCGGTGATATTCTCATTTTAGCCATTTATTATTTCTTCTCTTTTCTACAGTATTTAAAGATAC**  
**CCCAAGAGCTAATTTAACAAGACGAACTCCAATTCAGTGTCTTGCATTTCTAAAACCTTAAATACCAGAAAACAGCTTTTTCAAAGTTGTTT**  
**TCAAAGTTGGCGTATAACATAGTATCGACGGAGCCGATTTTGAACCGCGGTGATCACAGGCAGCAACGCTCTGTATCGTTACAATCAACATGC**  
**TACCTCCCGGAGATCATCCGTGTTTTCAAACCGGAGCTTAGTTGCCGTTCTTCCGAATAGCATCGGTAACATGAGCAAAGTCTGCCGCTTAC**  
**AACGGCTCTCCCGCTGACGCCGCTCCCGACTGATGGGCTGCCTGTATCGAGTGGTGTATTTGTGCCGAGCTGCCGGTCCGGGAGCTGTGGCTGG**  
**CTGGTGGCAGGATATATTTGGTGTAAACAAATTCAGCCTTAGACAACCTAATAACATTTGCCGAGCTTTTTAATGACTGAATTAACGCCGAA**  
**TTAATTCGGGGATCTGGATTTTAGTACTGGATTTTGGTTTTAGGAATTAGAAATTTATTGATAGAAGTATT [...]**

*MpRSL1<sup>GOF5</sup>* (Right-border insertion site)

[...] **GGCCGACGTCGCATGCTCCCGGCCCATGGCGCCGCGGAATTCGATTCCTGAATGGCGAATGCTAGAGCAGCTTGAGCTTGGATCAGAT**  
**TGTCGTTTCCCGCTTCACTTAACTATCAGTGTTCGACCAATTAGAAGGGGCCACGTCGCCACCTCCAATGGCTAGATAGAGGGC**  
**TATTTCCAGGAAGTGAACGAATTCCTTACTGAGATGTTTTACTTTTGTCTTCCAAAGTAGAGGACATACGTGTCTCTGTTCCGAGAGGA**  
**GCACAGAAAGACCTTCCGAAGGTAGTTTTCCGTATCGTTACTACTATCTGTAATCAAAGCTTATCTTCCACTTCTACTTACTACCAATCCC**  
**AGCTTTGACACGTTGCTATCACTGAACGCATGATGGATGTCCATTATGGCTGTTTAACTGTGGGTAGGCTTCGTTTAAAGTAGACACCTAGAATGT**  
**GTGTGGACGGACGGATGGAAGAAAGCTTTCGAACCGAGAGCCTGCTCTAATCGAATTTCTAATCTTCAACACTAGAATATACTATATCACTGAT**  
**TGAGTTCTTCTTCCGGAAGAAAATTAGTACACTGTATGTTAGCTCACCAGTAAGTATCTTACGCGCTACTTTTCAATTTACTAATTAACAC**  
**TAAGCATGCCGCTAATAAGTTCTCATGGTGCAACCGGTGCTCCTCGCGTGTACGGTTGCCGGACTATAGTGACACGTCACACGAGGCCTT**  
**ACTCCGTTAGAGTTGCAGAGGGCTGGATCTTGTGGAATGGCGAAAGTAAGGCAAGTTTTAGCTGGACGTTGGGATGCTCTCTCCATGTTGCCAG**  
**ACTGTCGGTCTCGACCGTAGCCAACAGTAGCGACAGTCATGGTCAATCAAAGCTTGAAGTTCTGTACCTATTTCTCAATTAACATCTGA**  
**CTCGCAACATCACTAGTGAATTCGGCGCCGCTGCAGGTCGACCATATGGGAGAGCTCCCAACGCGTTGGATGCATAGCTTG**

*MpRsl1-1* (Right-border insertion site)

AATGTTTTCTAGCGATTGTTCTTACAGCAGGGACTCATGCAGCAGAAGAATTATAATGGTGTATCTACGATGAATCACGACAAAAGCAGTACTT  
GAGCAGTAATTTCCGTTGTACTTCAACCAATCTTCTAGTTCCACTTTAGATACTACTAACACTATATGAATACATCTACTTCCGAATCAGAGGT  
TTGGTGAGAATGCACAGCCAAAATTTGTTGCTCGAGTCATTGTCCGGTAACCTAGTGTTCGTAACCTGGAGACAAATATCTCCGGTAGTCAT  
AATCCATCGGAGTCCGTCAAACACTGATAGTTTTAACTGAAGGGCGGAAACGACAATCTGATCCAAGCTCAAGCTGCTCTAGCATTGCCATTCA  
GGAATCACTAGTGAATTCGCGGCCCTGCAGGTCGACCATATGGGAGAGCTCCCAACGCGTTGGATGCATAGCTTGAGTATCTATAGTGTAC  
CTAAATAGCTTGGCGTAATCATGGTTCATAGCTGTTTTCTGTGTGAAATTTGTTATCCGCTCACAATTCACACAACATACGAGCCGGGAGCATAAA  
GTGTAAAGCCTGGGGTGCTAATGAGTGAGCTAATCACATTAATGCGTTGCGCTCACTGCCCGCTTCCAGTCGGGAAACCTGTCTGCCAGC  
TGCATTAATGAATCGGCCAACGCGCGGGGAGAGGCGTTTTGCGTATT**GGCGCTCTCCGCTTCCGCTCACTGACTCGCTGCCGCTCGGTTCGTT**  
**CGGCTCGCGGAGCGTATCAGTCACTCAAAGCGGTAATACGGTTATCCACAGAATCAGGGGATAACGCAGGAAAGAACATGTGAGCAAAGG**  
**NCAGCAAAGCCAGGAACCTAAAAGCCGCTTGTGGCGTTTTTCCATAGGCTCCGCCCCCTGACGAGCATCACAAAATTCGACGCTCAA**  
**GTCAGAGGTGGCGAAACCCGACAGGACTATAAAGATACCAGGCGTTTTCCCTGGAAGCTCCCTCGTGGCTCTCCTGTTCCGACC [...]**

*MpRsl1-1* (Left-border insertion site)

[...] **GTCATTTGTTTACACCACAATATAT**ATGGCTATTTGTATTCTACGCAGAAAAAGTGGACACCCTTGAAAGCTTGAGGAAGTGGCCGAACAA  
TGCCAGTGGGAATGGGTGAAAGATGCTACTGCTAACCCAAACCATAGGTAATTTGGGAAGGTTTTTCGTCTACAATAGTAACGGAGATAAGGAAG  
ATGCTTTGTACGACACTTGGCCACCATCGAGCGTCGGACAAAACCATGCCTTGGATCCGGTACCCGAGACCGATTCTAGGAAGCGATTTCTCCAG  
ATGAGTCTGGGGCAACCAACGATACGAATCACAAGCGCCTGCATTTGGTGAAGTTCGCAGAGACTAATTTGATTTTGCACATTTTGGTGGACAT  
CGATTCGCGCCTCATACTCTTTCAATGCTCTTTGAGCTCTGGCTGGAGTATGAATCAGTTGACAACTTCCNTTCCAGTTTTCCAGTTTGGCCA  
TCATGTGTTTTCCATGCGTGTCCGTTTTCTGCTGAAACAATCGTCCACCAGCAAGTTACNACACCCTCAAGAATGGCCTGTGTGAGAGTAGGA  
ATGTGATTAACCTGACCAAAAATCCGAAATTTGTTTAGGAATTTTTCATNCGTC

*MpRsl1-2* (Left-border insertion site)

[...] **GTCTAGCGTCATTTGTGTT**ATTTTGCACATTTGTGGTGACATCGATTCCGCGCTCATACTCTTCAATTTGCTCTTTGAGCTCTGGCTGGAG  
TATGAATCAGTTGACAACTTCCATTCAGTTTTCCAGTTTGGCCATCATGTTGTTTTCCATGCGTGTCCGGTTTTCTGCTGAACAATCGTCCACC  
AGCAAGTTACGACACCCTTCAAGAATGGCCTGTGTGAGAGTAGGAATGTGATTAACCTGACCAAAATCCGAAATTTGTTTAGGAATTTTTCTTC  
GTCTACTGACATTTCTGAAACGATCAAACCCATGCAGGACACGCTCCTCAAACGTGCAGACAACGGTTGCGCCTACCCTCTAAAGCGCTCATCT  
CATGGGCTCTTCTCTCACATCCACCTGTTCTAAGACTGTAGACGCCATTAACCTTGGGCTCTACCTTACACCAAGTCGAATTCACGACATGCC  
GTCCGGCCGGCTTTGAACACCAATCTGAAGCCGCGAGCCGGCAGGCGAGTGCGAACGATCCTCAGAGCATAGCAGCTCGCGTAAGTTCCATTA  
TCTGTGCTAAAGCCGACATCGAGTTCTGAGCTCACAGTAGACGTTTTCAATGAGAAGTGGATGTCCAATATGTTAAGTCCGTTGTCTGCTTCTCC  
GTATGTGATGGGCCGAAAGCGTATCATGCATCTAACGACCTATTTTCGCGACATTTGTTTGCAGCATCGGAGGGAAACGCATCAGCGAGCGACTG  
AAGACTCTACAAGATCTTGTTCCTAATGGTTCCAAGGTAATCGATCAGGAAAGGACGAAGATTTTCTGCTGCTGGGTTAAGAGCGAATATCAG  
TGGAACGAGCAAGTTGTGCGCGGAGTAGCCTATAATCTCAATTTTGAATACTTTTCCCGATTCTTGCAATTTAGATGTGCAAT
